# Supplementary material for: Novel mitochondria targeted copper(ii) complexes of ferrocenyl terpyridine and anticancer active 8-hydroxyquinolines showing remarkable cytotoxicity, DNA and protein binding affinity
Source: Royal Society of Chemistry journal article supplement (doi:10.1039/c6dt03660k), 2016-11-24
Supplement: c6dt03660k1.pdf [file c6dt03660k1.pdf]

## Electronic Supporting Information (ESI†)

for

### Novel mitochondria targeted copper(II) complexes of ferrocenyl terpyridine and anticancer active 8-hydroxyquinolines showing remarkable cytotoxicity, DNA and protein binding affinity

Banashree Deka,<sup>a</sup> Tukki Sarkar,<sup>a</sup> Samya Banerjee,<sup>\*b</sup> Arun Kumar,<sup>c</sup> Sanjoy Mukherjee,<sup>d</sup> Sasanka Deka,<sup>\*e</sup> Kandarpa K. Saikia<sup>\*f</sup> and Akhtar Hussain<sup>\*a</sup>

<sup>a</sup> Department of Chemistry, Handique Girls' College, Guwahati 781001, Assam, India. E-mail: [akhtariisc@gmail.com](mailto:akhtariisc@gmail.com)

<sup>b</sup> Department of Chemistry, Johns Hopkins University, Baltimore, Maryland 21218, United States. E-mail: [sbanerj8@jhu.edu](mailto:sbanerj8@jhu.edu)

<sup>c</sup> Department of Inorganic and Physical Chemistry, Indian Institute of Science, Bangalore 560 012, Karnataka, India.

<sup>d</sup> School of Chemical Engineering, Purdue University, West Lafayette, Indiana 47906, United States.

<sup>e</sup> Department of Chemistry, University of Delhi, New Delhi 110024, India.

E-mail: [ssdeka@gmail.com](mailto:ssdeka@gmail.com)

<sup>f</sup> Department of Bioengineering and Technology, GUIST, Gauhati University, Guwahati 781014, Assam, India.

E-mail: [kksaikia@gmail.com](mailto:kksaikia@gmail.com)

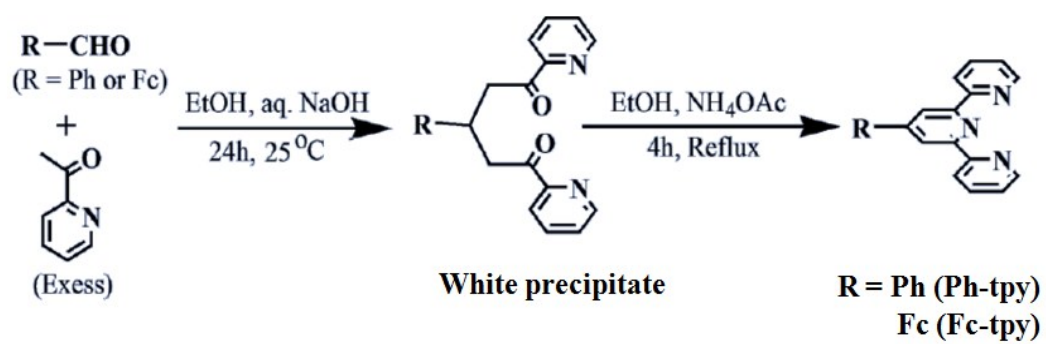

**Fig. S1:** Synthetic scheme for the preparation of Ph-tpy and Fc-tpy ligands.

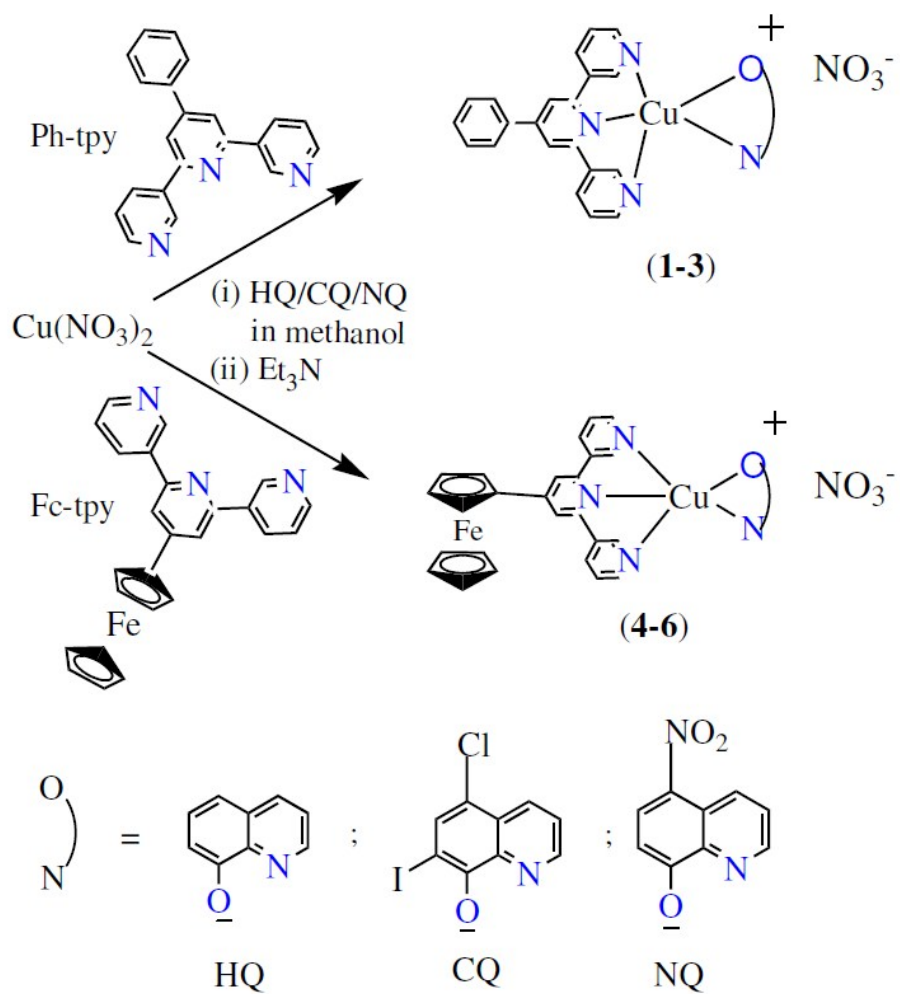

**Fig. S2:** Synthetic scheme for the preparation of the complexes **1-6**.

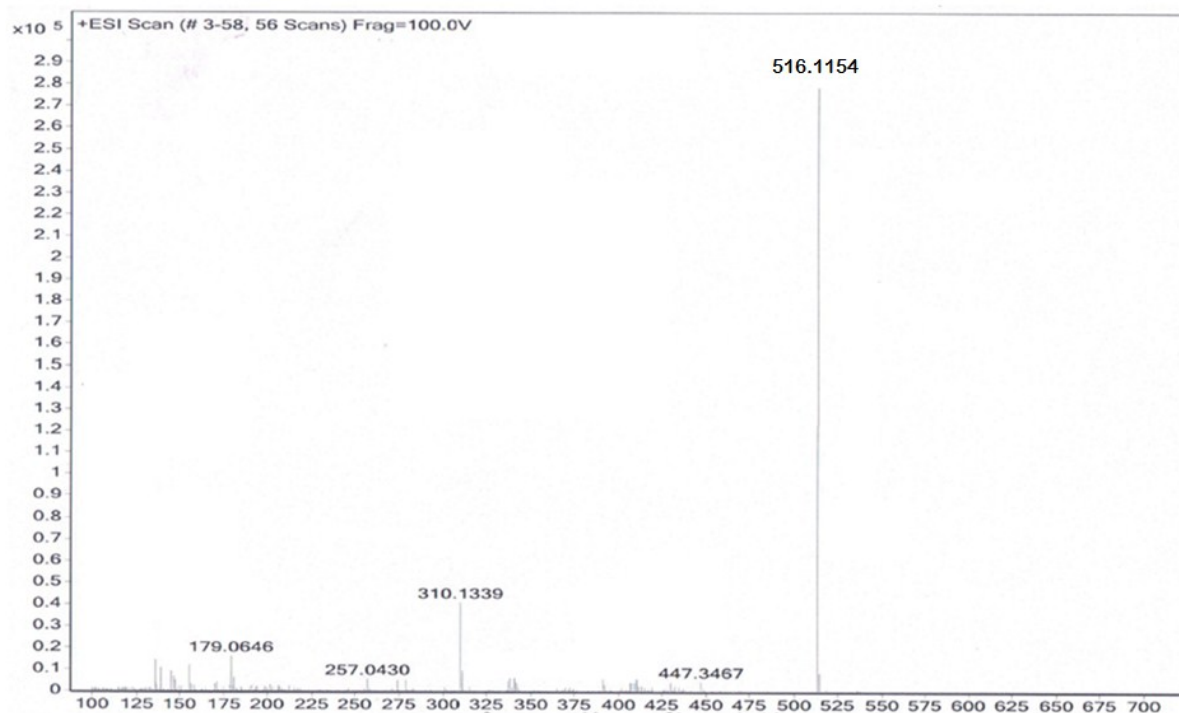

**Fig. S3.** The ESI-MS spectrum of complex  $[\text{Cu}(\text{Ph-tpy})(\text{HQ})]\text{NO}_3$  (**1**) showing the prominent  $[\text{M}-(\text{NO}_3^-)]^+$  peak at  $m/z = 516.1154$ . The peak at 310.1339 corresponds to  $\text{M} + 1$  species for the Ph-tpy ligand.

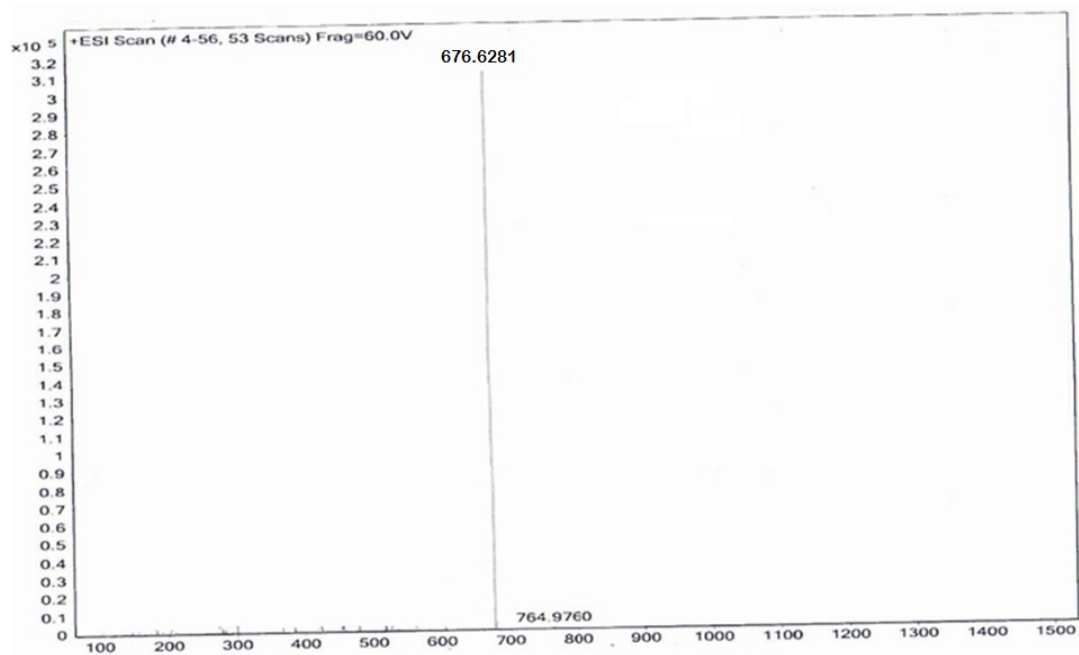

**Fig. S4.** The ESI-MS spectrum of the complex  $[\text{Cu}(\text{Ph-tpy})(\text{CQ})]\text{NO}_3$  (**2**) showing the prominent  $[\text{M}-(\text{NO}_3^-)]^+$  peak at  $m/z = 676.6281$

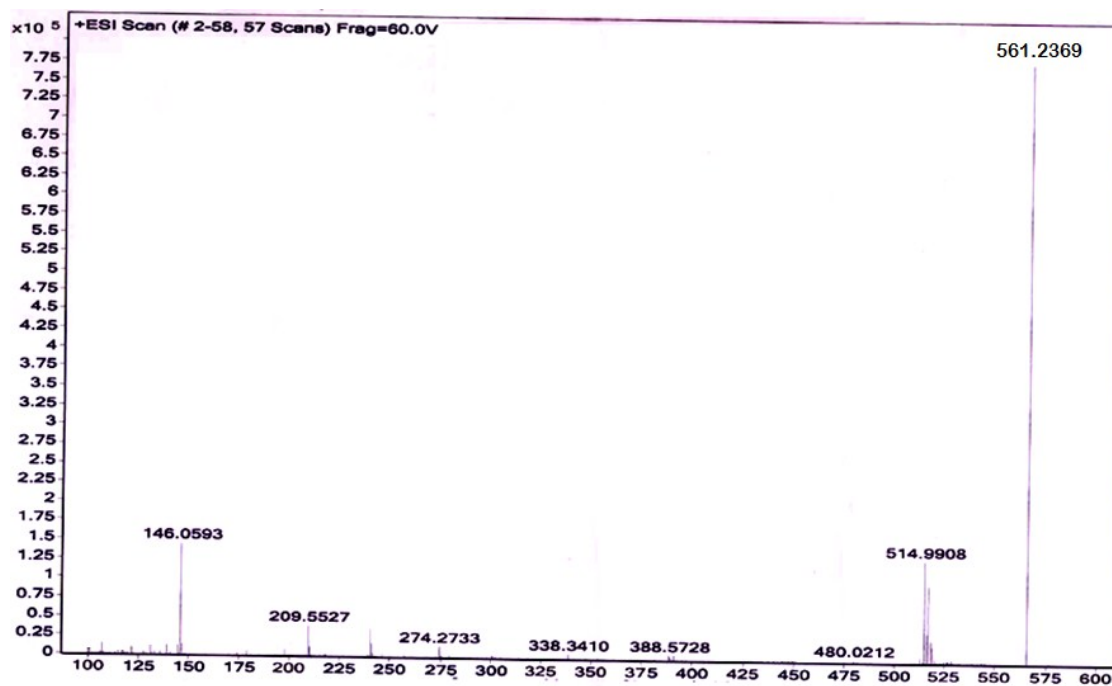

**Fig. S5.** The ESI-MS spectrum of the complex  $[\text{Cu}(\text{Ph-tpy})(\text{NQ})]\text{NO}_3$  (**3**) showing the prominent  $[\text{M}-(\text{NO}_3^-)]^+$  peak at  $m/z = 561.2369$ .

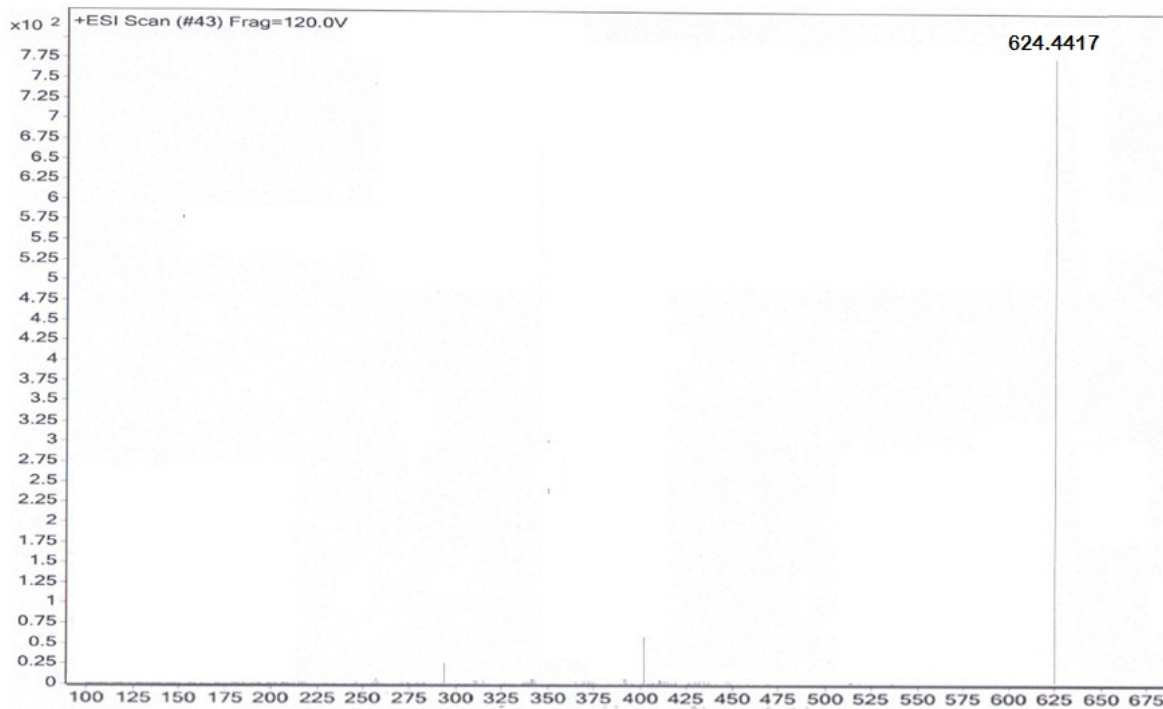

**Fig. S6.** The ESI-MS spectrum of the complex  $[\text{Cu}(\text{Fc-tpy})(\text{HQ})]\text{NO}_3$  (**4**) showing the prominent  $[\text{M}-(\text{NO}_3^-)]^+$  peak at  $m/z = 624.4417$ .

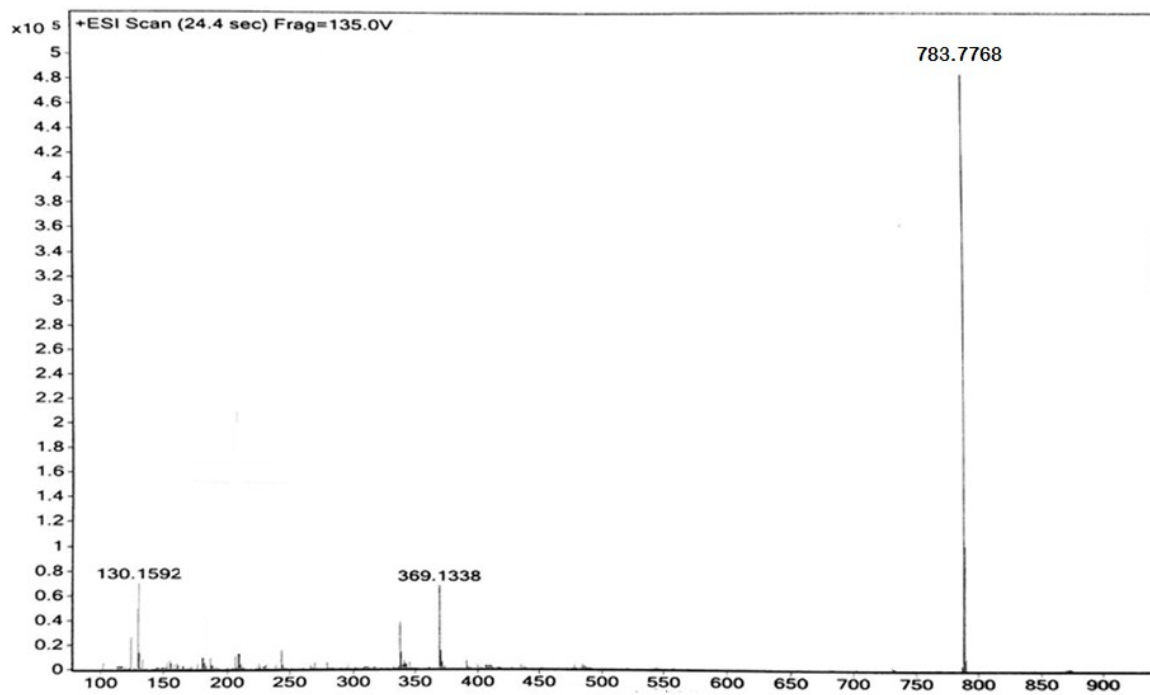

**Fig. S7.** The ESI-MS spectrum of the complex  $[\text{Cu}(\text{Fc-tpy})(\text{CQ})]\text{NO}_3$  (**5**) showing the prominent  $[\text{M}-(\text{NO}_3^-)]^+$  peak at  $m/z = 783.7768$ .



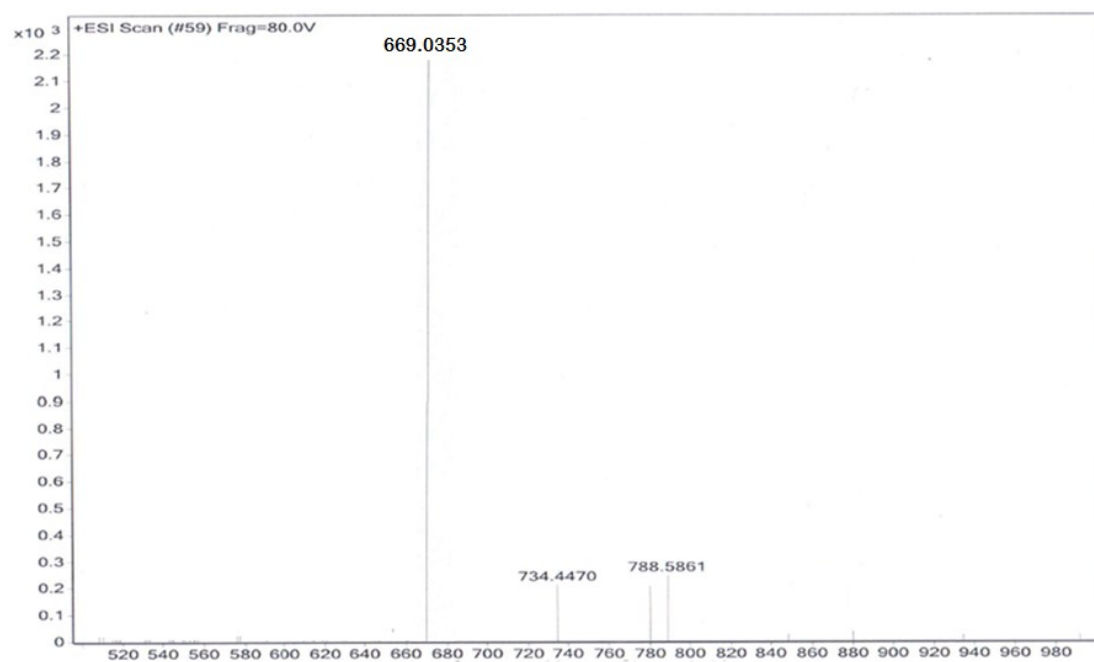

**Fig. S8.** The ESI-MS spectrum of the complex  $[\text{Cu}(\text{Fc-tpy})(\text{NQ})]\text{NO}_3$  (**6**) showing the prominent  $[\text{M}-(\text{NO}_3^-)]^+$  peak at  $m/z = 669.0353$ .

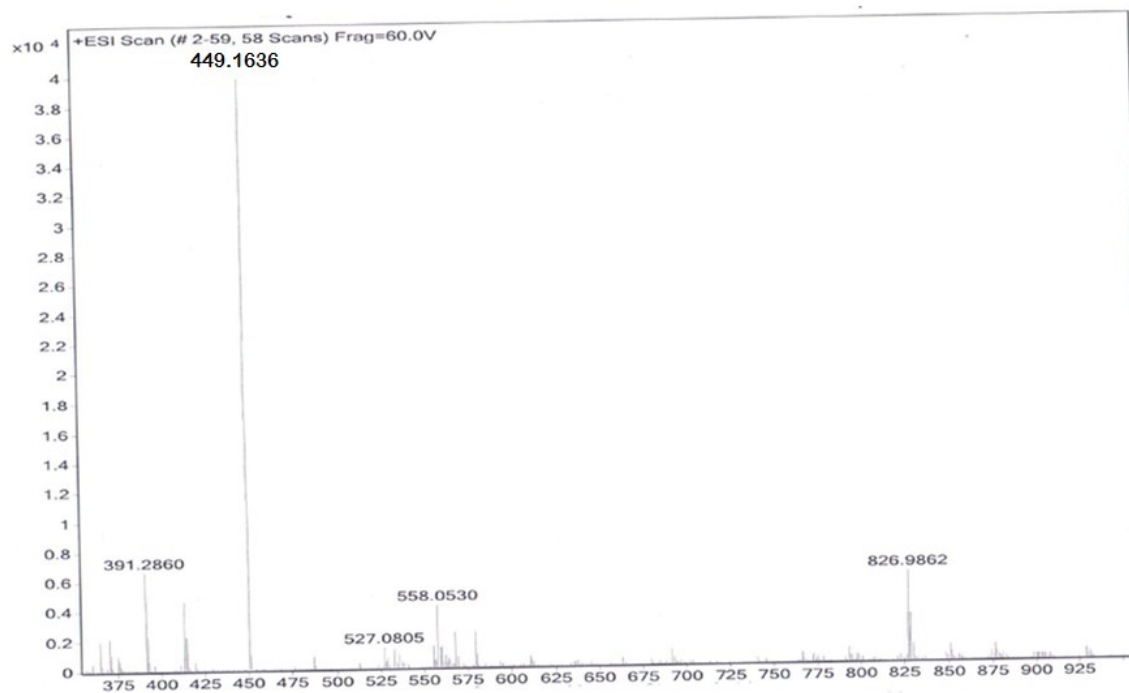

**Fig. S9.** The ESI-MS spectrum of the complex  $[\text{Cu}(\text{Fc-tpy})_2](\text{ClO}_4)_2$  (**7**) showing the prominent  $[\text{M}-2(\text{ClO}_4^-)]^{2+}$  peak at  $m/z = 449.1636$ .

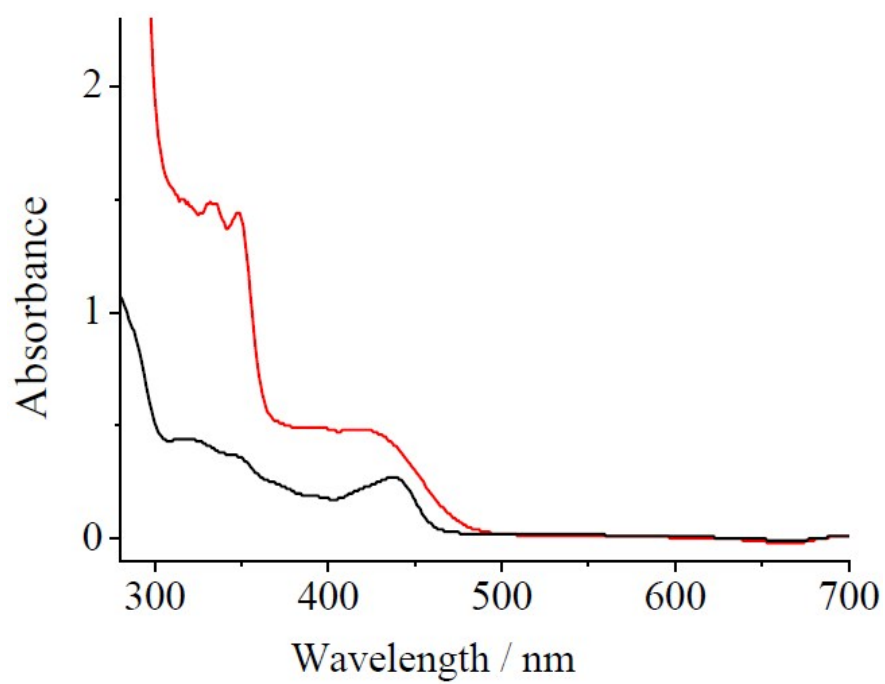

**Fig. S10.** The electronic absorption spectra of complexes **2** (red) and **3** (black) recorded in DMF.

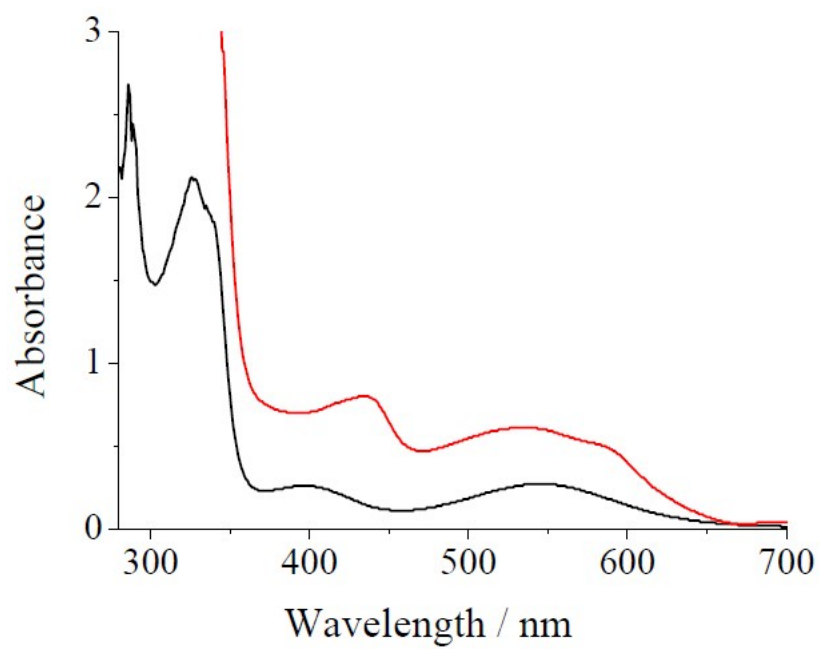

**Fig. S11.** The electronic absorption spectra of complexes **4** (black) and **6** (red) recorded in DMF.

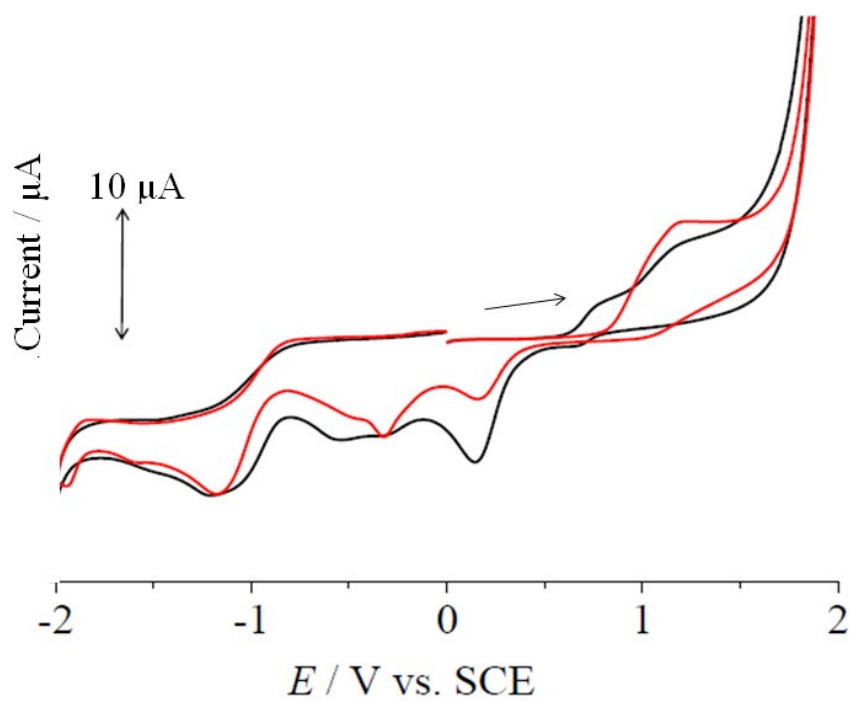

**Fig. S12.** Cyclic voltammograms of complexes **1** (red) and **4** (black) recorded in DMF in the presence of 0.1 M TBAP as supporting electrolyte.

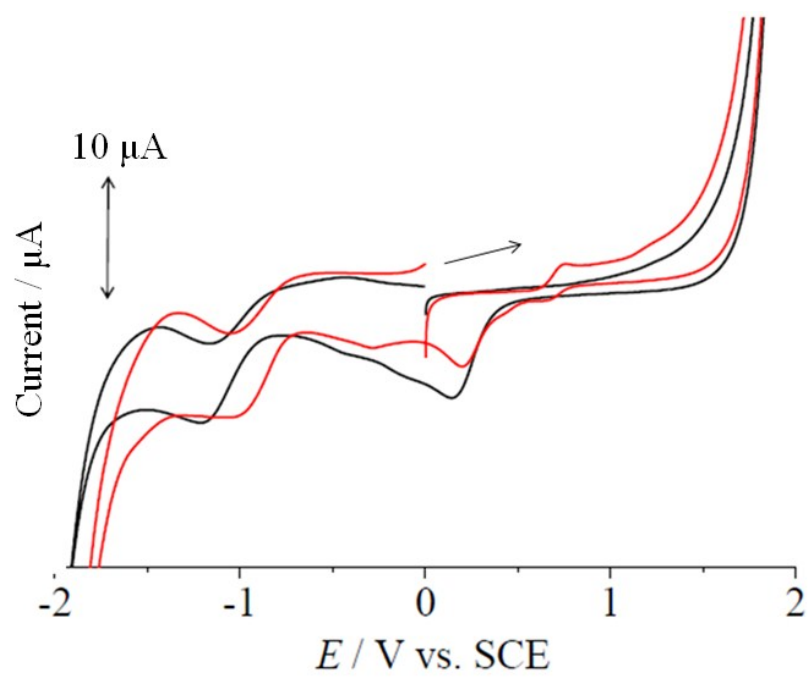

**Fig. S13.** Cyclic voltammograms of complexes **3** (black) and **6** (red curve) recorded in DMF in the presence of 0.1 M TBAP as supporting electrolyte.

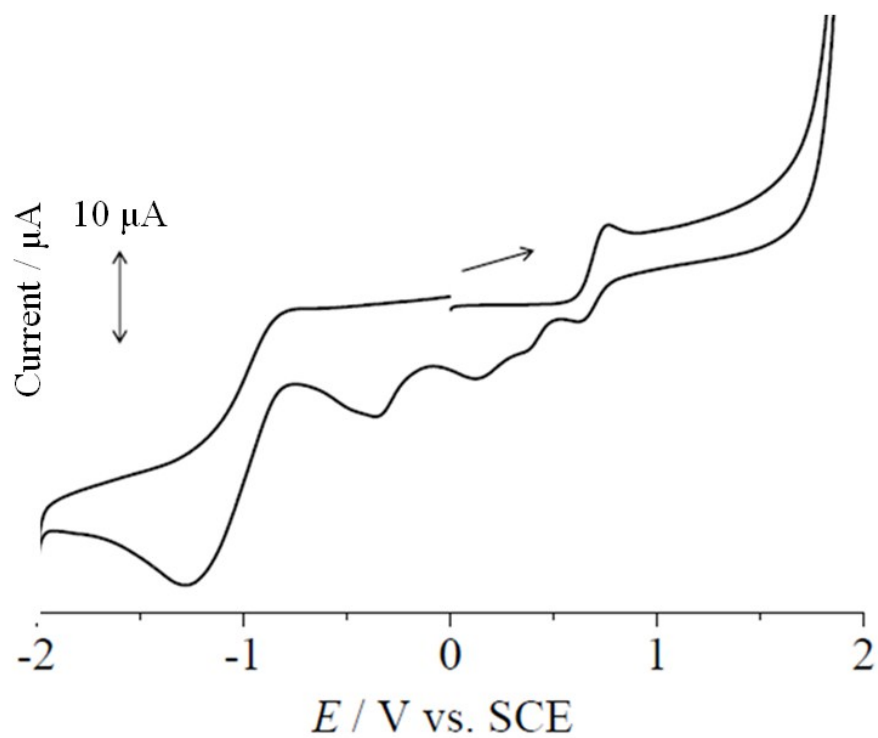

**Fig. S14.** Cyclic voltammograms of complex 7 recorded in DMF in the presence of 0.1 M TBAP as supporting electrolyte.

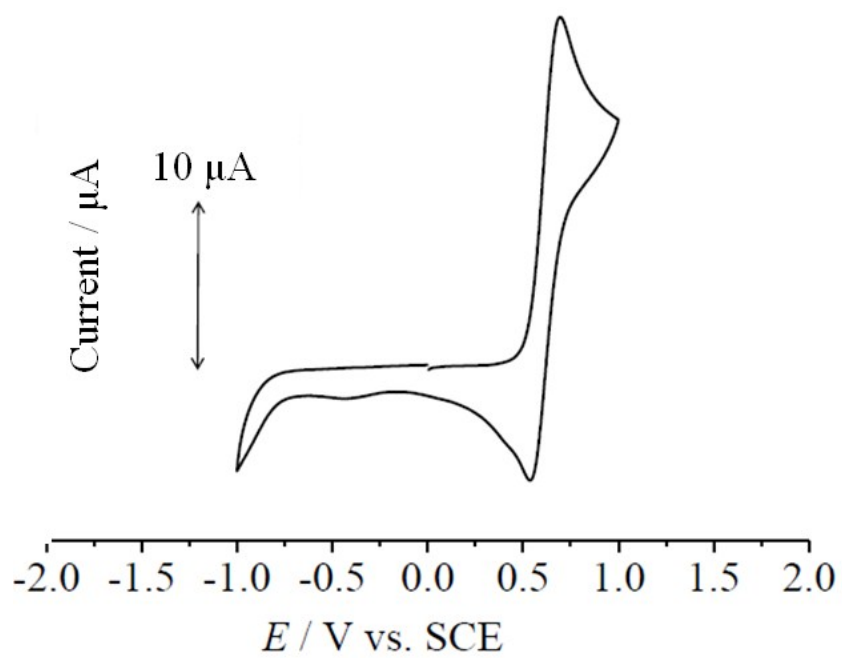

**Fig. S15.** Cyclic voltammograms of the free Fc-tpy ligand recorded in DMF in the presence of 0.1 M TBAP as supporting electrolyte.



**Table S1.** Selected bond distances (Å) and angles (°) for the complex [Fe(Fc-tpy)<sub>2</sub>](NO<sub>3</sub>)(PF<sub>6</sub>).2H<sub>2</sub>O (**7** as NO<sub>3</sub><sup>-</sup>PF<sub>6</sub><sup>-</sup> salt) with estimated standard deviations (esd) in the parentheses.

|                   |            |                   |            |
|-------------------|------------|-------------------|------------|
| Cu(1)-N(1A)       | 2.180(3)   | N(2A)-Cu(1)-N(2B) | 175.11(15) |
| Cu(1)-N(1B)       | 2.180(3)   | N(2A)-Cu(1)-N(3B) | 99.51(10)  |
| Cu(1)-N(2A)       | 1.973(3)   | N(1B)-Cu(1)-N(3A) | 93.87(11)  |
| Cu(1)-N(2B)       | 1.973(3)   | N(2B)-Cu(1)-N(3A) | 99.51(10)  |
| Cu(1)-N(3A)       | 2.182(3)   | N(3B)-Cu(1)-N(3A) | 95.63(15)  |
| Cu(1)-N(3B)       | 2.182(3)   | N(1A)-Cu(1)-N(2A) | 77.60(10)  |
| N(1A)-Cu(1)-N(1B) | 87.84(16)  | N(1A)-Cu(1)-N(3A) | 154.15(10) |
| N(1A)-Cu(1)-N(2B) | 106.03(11) | N(2A)-Cu(1)-N(3A) | 77.14(10)  |
| N(1A)-Cu(1)-N(3B) | 93.87(11)  | N(1B)-Cu(1)-N(2B) | 77.60(10)  |
| N(2A)-Cu(1)-N(1B) | 106.03(11) | N(1B)-Cu(1)-N(3B) | 154.15(10) |
|                   |            | N(2B)-Cu(1)-N(3B) | 77.14(10)  |

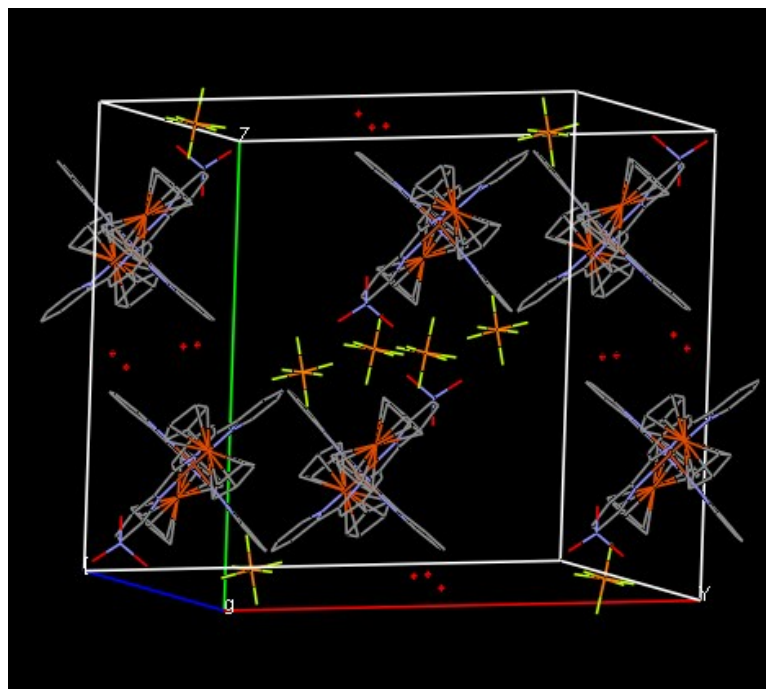

**Fig. S16.** The unit cell packing diagram for complex **7** (as NO<sub>3</sub><sup>-</sup>PF<sub>6</sub><sup>-</sup> salt) in the solid state.

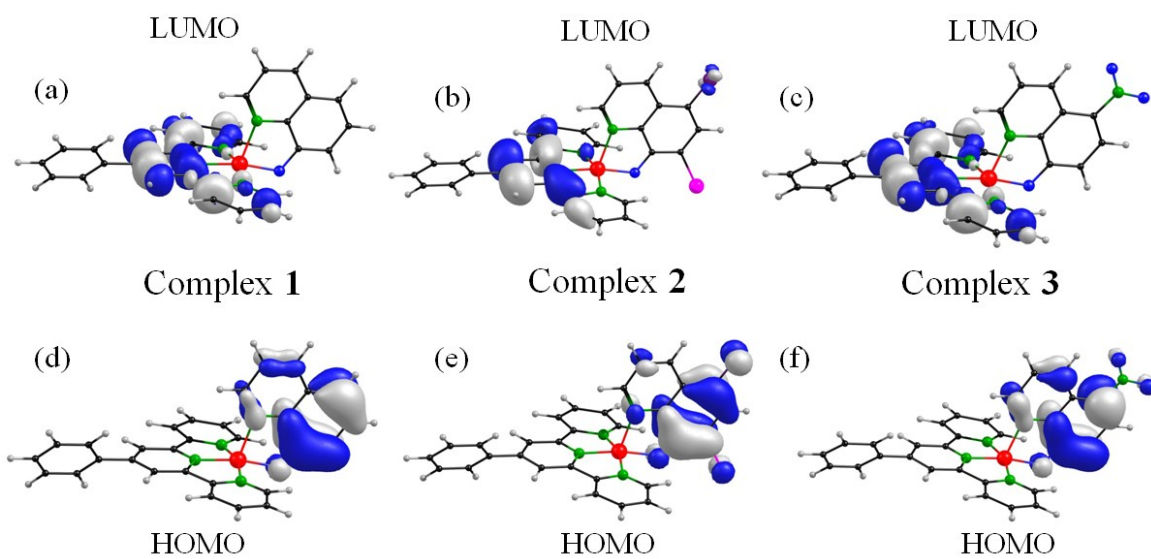

**Fig. S17.** The HOMOs and LUMOs of the complexes **1-3** corresponding to their DFT optimized structures.

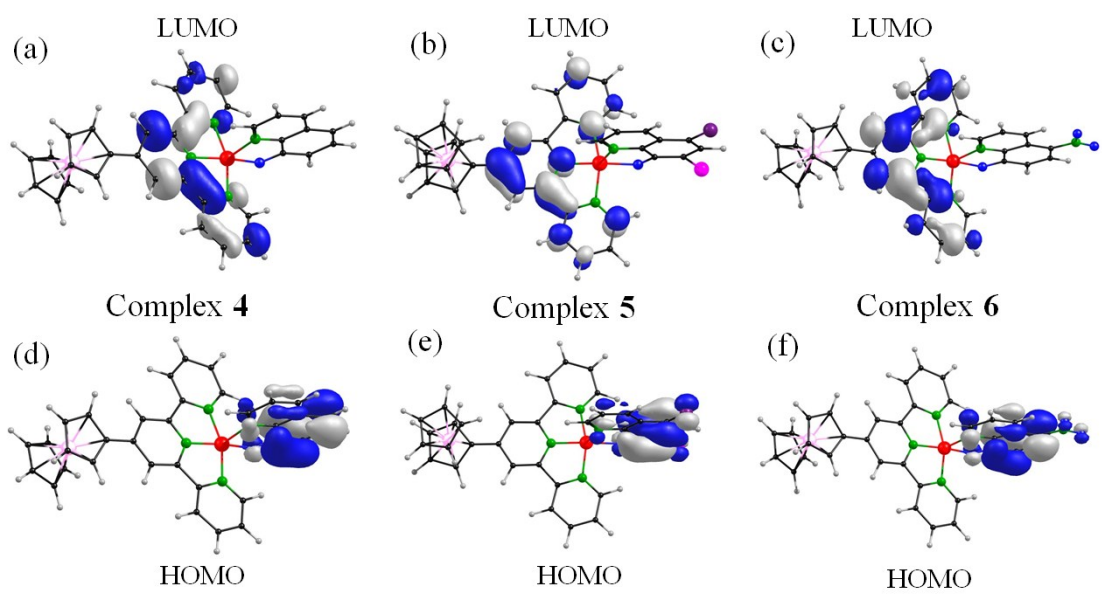

**Fig. S18.** The HOMOs and LUMOs of the complexes **4-6** corresponding to their DFT optimized structures.

**Table S2.** The DFT coordinates used for energy optimization of complex **1**.

| Centre No. | Atomic No. | Atomic Type | Coordinates (Angstroms) |           |           |
|------------|------------|-------------|-------------------------|-----------|-----------|
|            |            |             | X                       | Y         | Z         |
| 1          | 6          | 0           | 0.053684                | -4.632261 | -0.981229 |
| 2          | 6          | 0           | -0.917142               | -3.660626 | -0.667237 |
| 3          | 6          | 0           | -0.544738               | -2.318603 | -0.677071 |
| 4          | 7          | 0           | 0.752526                | -1.910206 | -0.979804 |
| 5          | 6          | 0           | 1.669377                | -2.859011 | -1.283378 |
| 6          | 6          | 0           | 1.348146                | -4.234580 | -1.293599 |
| 7          | 6          | 0           | -3.532526               | -0.008604 | 0.062614  |
| 8          | 6          | 0           | -2.844841               | 1.219731  | -0.041925 |
| 9          | 6          | 0           | -1.473685               | 1.202618  | -0.313871 |
| 10         | 7          | 0           | -0.808648               | 0.014846  | -0.467688 |
| 11         | 6          | 0           | -1.469188               | -1.183329 | -0.396277 |
| 12         | 6          | 0           | -2.839416               | -1.224434 | -0.122700 |
| 13         | 6          | 0           | -0.926607               | 3.694573  | -0.393171 |
| 14         | 6          | 0           | 0.042048                | 4.689394  | -0.632358 |
| 15         | 6          | 0           | 1.336653                | 4.319489  | -0.976616 |
| 16         | 6          | 0           | 1.660590                | 2.947843  | -1.072262 |
| 17         | 7          | 0           | 0.745961                | 1.976677  | -0.841437 |
| 18         | 6          | 0           | -0.551913               | 2.358067  | -0.507677 |
| 19         | 6          | 0           | 5.099383                | 0.041111  | -0.931791 |
| 20         | 6          | 0           | 3.744733                | 0.027480  | -0.590771 |
| 21         | 6          | 0           | 3.372771                | -0.021587 | 0.814293  |
| 22         | 6          | 0           | 4.385200                | -0.054703 | 1.813541  |
| 23         | 6          | 0           | 5.746761                | -0.039317 | 1.421612  |
| 24         | 6          | 0           | 6.080961                | 0.007601  | 0.076458  |
| 25         | 7          | 0           | 2.010508                | -0.033301 | 1.103155  |

|    |    |   |           |           |           |
|----|----|---|-----------|-----------|-----------|
| 26 | 6  | 0 | 1.653888  | -0.078042 | 2.391451  |
| 27 | 6  | 0 | 2.604316  | -0.113770 | 3.463437  |
| 28 | 6  | 0 | 3.946965  | -0.102356 | 3.180119  |
| 29 | 8  | 0 | 2.795951  | 0.057556  | -1.495659 |
| 30 | 29 | 0 | 1.057035  | 0.030344  | -0.819630 |
| 31 | 6  | 0 | -4.979200 | -0.022033 | 0.356695  |
| 32 | 6  | 0 | -5.469216 | -0.777173 | 1.434981  |
| 33 | 6  | 0 | -6.838178 | -0.783756 | 1.712522  |
| 34 | 6  | 0 | -7.721070 | -0.048221 | 0.914294  |
| 35 | 6  | 0 | -7.233757 | 0.700086  | -0.162737 |
| 36 | 6  | 0 | -5.865197 | 0.719495  | -0.442065 |
| 37 | 1  | 0 | -0.219295 | -5.692691 | -0.979188 |
| 38 | 1  | 0 | -1.937203 | -3.964106 | -0.425275 |
| 39 | 1  | 0 | 2.688882  | -2.502496 | -1.529472 |
| 40 | 1  | 0 | 2.119195  | -4.968393 | -1.546223 |
| 41 | 1  | 0 | -3.383998 | 2.160042  | 0.094312  |
| 42 | 1  | 0 | -3.378241 | -2.173083 | -0.065903 |
| 43 | 1  | 0 | -1.946192 | 3.976434  | -0.124523 |
| 44 | 1  | 0 | -0.232589 | 5.745967  | -0.547193 |
| 45 | 1  | 0 | 2.105950  | 5.072083  | -1.173089 |
| 46 | 1  | 0 | 2.680616  | 2.613319  | -1.345572 |
| 47 | 1  | 0 | 5.384717  | 0.077793  | -1.980428 |
| 48 | 1  | 0 | 6.522633  | -0.064485 | 2.183213  |
| 49 | 1  | 0 | 7.133124  | 0.019352  | -0.219870 |
| 50 | 1  | 0 | 0.583992  | -0.086927 | 2.623027  |
| 51 | 1  | 0 | 2.240067  | -0.149365 | 4.489742  |
| 52 | 1  | 0 | 4.696522  | -0.128668 | 3.973439  |
| 53 | 1  | 0 | -4.786367 | -1.347683 | 2.063452  |

|    |   |   |           |           |           |
|----|---|---|-----------|-----------|-----------|
| 54 | 1 | 0 | -7.220142 | -1.364421 | 2.554025  |
| 55 | 1 | 0 | -8.791067 | -0.058448 | 1.131847  |
| 56 | 1 | 0 | -7.924633 | 1.269996  | -0.786637 |
| 57 | 1 | 0 | -5.492820 | 1.298780  | -1.286417 |

---

**Table S3.** The DFT coordinates used for energy optimization of complex **2**.

| Centre No. | Atomic No. | Atomic Type | Coordinates (Angstroms) |           |           |
|------------|------------|-------------|-------------------------|-----------|-----------|
|            |            |             | X                       | Y         | Z         |
| 1          | 6          | 0           | -1.100717               | -4.530578 | -1.268121 |
| 2          | 6          | 0           | -2.095654               | -3.588481 | -0.937633 |
| 3          | 6          | 0           | -1.722827               | -2.258423 | -0.763509 |
| 4          | 7          | 0           | -0.401036               | -1.835111 | -0.896407 |
| 5          | 6          | 0           | 0.538521                | -2.753393 | -1.223456 |
| 6          | 6          | 0           | 0.216930                | -4.115440 | -1.416974 |
| 7          | 6          | 0           | -4.759782               | 0.004869  | -0.071756 |
| 8          | 6          | 0           | -4.061058               | 1.229806  | 0.002242  |
| 9          | 6          | 0           | -2.671463               | 1.222520  | -0.147130 |
| 10         | 7          | 0           | -2.001383               | 0.045140  | -0.352048 |
| 11         | 6          | 0           | -2.668189               | -1.147476 | -0.454894 |
| 12         | 6          | 0           | -4.057246               | -1.196931 | -0.309382 |
| 13         | 6          | 0           | -2.103338               | 3.705528  | 0.030085  |
| 14         | 6          | 0           | -1.110296               | 4.703221  | -0.041332 |
| 15         | 6          | 0           | 0.207714                | 4.344425  | -0.295955 |
| 16         | 6          | 0           | 0.531733                | 2.980048  | -0.467770 |
| 17         | 7          | 0           | -0.405935               | 2.006294  | -0.393323 |
| 18         | 6          | 0           | -1.728326               | 2.377343  | -0.153473 |
| 19         | 6          | 0           | 3.925381                | 0.022718  | -0.167624 |
| 20         | 6          | 0           | 2.538209                | 0.001170  | 0.013056  |
| 21         | 6          | 0           | 2.023507                | -0.172092 | 1.367617  |
| 22         | 6          | 0           | 2.913104                | -0.313305 | 2.467842  |
| 23         | 6          | 0           | 4.310181                | -0.280492 | 2.202347  |
| 24         | 6          | 0           | 4.806363                | -0.116763 | 0.917362  |
| 25         | 7          | 0           | 0.638460                | -0.188210 | 1.498505  |



|    |    |   |            |           |           |
|----|----|---|------------|-----------|-----------|
| 26 | 6  | 0 | 0.137510   | -0.345050 | 2.731352  |
| 27 | 6  | 0 | 0.959618   | -0.493612 | 3.892216  |
| 28 | 6  | 0 | 2.328800   | -0.478390 | 3.764662  |
| 29 | 8  | 0 | 1.694863   | 0.128284  | -0.969687 |
| 30 | 29 | 0 | -0.116699  | 0.068193  | -0.511652 |
| 31 | 6  | 0 | -6.226715  | -0.018639 | 0.089812  |
| 32 | 6  | 0 | -6.815146  | -0.872742 | 1.037285  |
| 33 | 6  | 0 | -8.203440  | -0.888805 | 1.190004  |
| 34 | 6  | 0 | -9.007855  | -0.064048 | 0.395976  |
| 35 | 6  | 0 | -8.422483  | 0.783077  | -0.551238 |
| 36 | 6  | 0 | -7.034352  | 0.812174  | -0.704366 |
| 37 | 1  | 0 | -1.374314  | -5.581716 | -1.408986 |
| 38 | 1  | 0 | -3.134283  | -3.905629 | -0.826908 |
| 39 | 1  | 0 | 1.577304   | -2.383150 | -1.341035 |
| 40 | 1  | 0 | 1.007168   | -4.824902 | -1.681871 |
| 41 | 1  | 0 | -4.607620  | 2.159385  | 0.178423  |
| 42 | 1  | 0 | -4.603104  | -2.139928 | -0.391680 |
| 43 | 1  | 0 | -3.141865  | 3.980090  | 0.224138  |
| 44 | 1  | 0 | -1.385513  | 5.753742  | 0.100932  |
| 45 | 1  | 0 | 0.996474   | 5.100076  | -0.365373 |
| 46 | 1  | 0 | 1.571044   | 2.655723  | -0.678590 |
| 47 | 1  | 0 | 5.889905   | -0.095876 | 0.745973  |
| 48 | 1  | 0 | -0.952772  | -0.357560 | 2.837087  |
| 49 | 1  | 0 | 0.484263   | -0.617209 | 4.865917  |
| 50 | 1  | 0 | 2.978561   | -0.590293 | 4.638168  |
| 51 | 1  | 0 | -6.194257  | -1.513391 | 1.662438  |
| 52 | 1  | 0 | -8.662137  | -1.546701 | 1.930379  |
| 53 | 1  | 0 | -10.093212 | -0.081827 | 0.515414  |

|    |    |   |           |           |           |
|----|----|---|-----------|-----------|-----------|
| 54 | 1  | 0 | -9.052106 | 1.422717  | -1.172537 |
| 55 | 1  | 0 | -6.585434 | 1.468920  | -1.448973 |
| 56 | 53 | 0 | 4.687751  | 0.267975  | -2.097839 |
| 57 | 17 | 0 | 5.409036  | -0.448191 | 3.508082  |

---

**Table S4.** The DFT coordinates used for energy optimization of complex **3**.

| Centre No. | Atomic No. | Atomic Type | Coordinates (Angstroms) |           |           |
|------------|------------|-------------|-------------------------|-----------|-----------|
|            |            |             | X                       | Y         | Z         |
| 1          | 6          | 0           | -0.591927               | -4.618519 | -1.164998 |
| 2          | 6          | 0           | -1.533422               | -3.654211 | -0.753388 |
| 3          | 6          | 0           | -1.169518               | -2.310548 | -0.783909 |
| 4          | 7          | 0           | 0.093260                | -1.891426 | -1.200724 |
| 5          | 6          | 0           | 0.980994                | -2.833826 | -1.598582 |
| 6          | 6          | 0           | 0.665929                | -4.210631 | -1.592390 |
| 7          | 6          | 0           | -4.082212               | -0.019105 | 0.258319  |
| 8          | 6          | 0           | -3.411204               | 1.212949  | 0.094426  |
| 9          | 6          | 0           | -2.074272               | 1.204330  | -0.311298 |
| 10         | 7          | 0           | -1.423829               | 0.019430  | -0.538866 |
| 11         | 6          | 0           | -2.068992               | -1.183067 | -0.408955 |
| 12         | 6          | 0           | -3.404648               | -1.230870 | -0.002017 |
| 13         | 6          | 0           | -1.543152               | 3.697423  | -0.432009 |
| 14         | 6          | 0           | -0.603724               | 4.696521  | -0.756026 |
| 15         | 6          | 0           | 0.654121                | 4.330989  | -1.220207 |
| 16         | 6          | 0           | 0.971705                | 2.960879  | -1.349972 |
| 17         | 7          | 0           | 0.086089                | 1.984916  | -1.037470 |
| 18         | 6          | 0           | -1.177286               | 2.362624  | -0.584484 |
| 19         | 6          | 0           | 4.434894                | 0.071181  | -1.581803 |
| 20         | 6          | 0           | 3.113619                | 0.050658  | -1.104142 |
| 21         | 6          | 0           | 2.894611                | -0.007526 | 0.342010  |
| 22         | 6          | 0           | 3.988580                | -0.042256 | 1.244213  |
| 23         | 6          | 0           | 5.307666                | -0.019318 | 0.700552  |
| 24         | 6          | 0           | 5.501291                | 0.036604  | -0.691545 |
| 25         | 7          | 0           | 1.560176                | -0.024872 | 0.739634  |

|    |    |   |           |           |           |
|----|----|---|-----------|-----------|-----------|
| 26 | 6  | 0 | 1.306174  | -0.076777 | 2.049201  |
| 27 | 6  | 0 | 2.344851  | -0.114657 | 3.035227  |
| 28 | 6  | 0 | 3.656702  | -0.097920 | 2.642067  |
| 29 | 8  | 0 | 2.087257  | 0.081016  | -1.886830 |
| 30 | 29 | 0 | 0.388813  | 0.044490  | -1.057437 |
| 31 | 6  | 0 | -5.491829 | -0.040454 | 0.693229  |
| 32 | 6  | 0 | -5.874651 | -0.821701 | 1.796484  |
| 33 | 6  | 0 | -7.209298 | -0.835435 | 2.207904  |
| 34 | 6  | 0 | -8.165504 | -0.081444 | 1.518638  |
| 35 | 6  | 0 | -7.785715 | 0.692728  | 0.416770  |
| 36 | 6  | 0 | -6.451573 | 0.719751  | 0.004123  |
| 37 | 1  | 0 | -0.858982 | -5.681029 | -1.147583 |
| 38 | 1  | 0 | -2.526171 | -3.965539 | -0.421528 |
| 39 | 1  | 0 | 1.971515  | -2.474711 | -1.937496 |
| 40 | 1  | 0 | 1.413949  | -4.938583 | -1.922972 |
| 41 | 1  | 0 | -3.938112 | 2.150301  | 0.290793  |
| 42 | 1  | 0 | -3.932197 | -2.182585 | 0.102019  |
| 43 | 1  | 0 | -2.535076 | 3.975784  | -0.069779 |
| 44 | 1  | 0 | -0.872163 | 5.752662  | -0.641796 |
| 45 | 1  | 0 | 1.400472  | 5.087068  | -1.484846 |
| 46 | 1  | 0 | 1.962730  | 2.635495  | -1.719952 |
| 47 | 1  | 0 | 6.532927  | 0.053200  | -1.080183 |
| 48 | 1  | 0 | 0.258672  | -0.090165 | 2.368605  |
| 49 | 1  | 0 | 2.072057  | -0.156410 | 4.091451  |
| 50 | 1  | 0 | 4.473645  | -0.126448 | 3.383279  |
| 51 | 1  | 0 | -5.134450 | -1.406390 | 2.341597  |
| 52 | 1  | 0 | -7.507462 | -1.436107 | 3.069358  |
| 53 | 1  | 0 | -9.209055 | -0.097435 | 1.840830  |

|    |   |   |           |           |           |
|----|---|---|-----------|-----------|-----------|
| 54 | 1 | 0 | -8.534205 | 1.276991  | -0.122030 |
| 55 | 1 | 0 | -6.164367 | 1.319026  | -0.859392 |
| 56 | 7 | 0 | 6.505308  | -0.051888 | 1.540083  |
| 57 | 8 | 0 | 6.377105  | -0.101245 | 2.755819  |
| 58 | 8 | 0 | 7.586025  | -0.027676 | 0.970901  |
| 59 | 1 | 0 | 4.607304  | 0.114551  | -2.657047 |

---

**Table S5.** The DFT coordinates used for energy optimization of complex **4**.

| Centre No. | Atomic No. | Atomic Type | Coordinates (Angstroms) |           |           |
|------------|------------|-------------|-------------------------|-----------|-----------|
|            |            |             | X                       | Y         | Z         |
| 1          | 6          | 0           | 0.465194                | 4.179854  | -2.559430 |
| 2          | 6          | 0           | -0.344025               | 3.355405  | -1.753764 |
| 3          | 6          | 0           | 0.263066                | 2.585661  | -0.763972 |
| 4          | 7          | 0           | 1.639750                | 2.602053  | -0.553226 |
| 5          | 6          | 0           | 2.400013                | 3.405059  | -1.334866 |
| 6          | 6          | 0           | 1.839035                | 4.210371  | -2.350162 |
| 7          | 6          | 0           | -2.336298               | 0.606641  | 1.292581  |
| 8          | 6          | 0           | -1.407847               | -0.022106 | 2.170006  |
| 9          | 6          | 0           | -0.048071               | 0.227308  | 2.016228  |
| 10         | 7          | 0           | 0.409294                | 1.055227  | 1.021465  |
| 11         | 6          | 0           | -0.467999               | 1.689905  | 0.179474  |
| 12         | 6          | 0           | -1.839850               | 1.479528  | 0.284500  |
| 13         | 6          | 0           | 0.951149                | -1.148981 | 3.921920  |
| 14         | 6          | 0           | 2.106300                | -1.527858 | 4.632961  |
| 15         | 6          | 0           | 3.345215                | -1.028690 | 4.247938  |
| 16         | 6          | 0           | 3.422873                | -0.153339 | 3.142656  |
| 17         | 7          | 0           | 2.324700                | 0.218900  | 2.443108  |
| 18         | 6          | 0           | 1.086788                | -0.279652 | 2.841769  |
| 19         | 6          | 0           | 6.233322                | 1.455544  | 0.006320  |
| 20         | 6          | 0           | 4.867027                | 1.178730  | 0.099518  |
| 21         | 6          | 0           | 4.322630                | 0.064778  | -0.662721 |
| 22         | 6          | 0           | 5.180419                | -0.718459 | -1.483305 |
| 23         | 6          | 0           | 6.559468                | -0.400685 | -1.546837 |
| 24         | 6          | 0           | 7.059498                | 0.664538  | -0.813243 |
| 25         | 7          | 0           | 2.956156                | -0.171535 | -0.537229 |

|    |    |   |           |           |           |
|----|----|---|-----------|-----------|-----------|
| 26 | 6  | 0 | 2.440362  | -1.191105 | -1.230621 |
| 27 | 6  | 0 | 3.228553  | -2.033360 | -2.082170 |
| 28 | 6  | 0 | 4.574655  | -1.801615 | -2.206677 |
| 29 | 8  | 0 | 4.058332  | 1.885326  | 0.847816  |
| 30 | 29 | 0 | 2.267636  | 1.342071  | 0.825819  |
| 31 | 1  | 0 | 0.006880  | 4.791569  | -3.342787 |
| 32 | 1  | 0 | -1.423548 | 3.326984  | -1.908259 |
| 33 | 1  | 0 | 3.489417  | 3.402817  | -1.135580 |
| 34 | 1  | 0 | 2.489149  | 4.845418  | -2.958251 |
| 35 | 1  | 0 | -1.766651 | -0.673667 | 2.968610  |
| 36 | 1  | 0 | -2.531779 | 1.981532  | -0.391796 |
| 37 | 1  | 0 | -0.026487 | -1.531667 | 4.219237  |
| 38 | 1  | 0 | 2.020258  | -2.210441 | 5.484211  |
| 39 | 1  | 0 | 4.256775  | -1.303209 | 4.785870  |
| 40 | 1  | 0 | 4.390411  | 0.267868  | 2.806693  |
| 41 | 1  | 0 | 6.647813  | 2.285770  | 0.572515  |
| 42 | 1  | 0 | 7.217513  | -0.997637 | -2.173250 |
| 43 | 1  | 0 | 8.124450  | 0.905001  | -0.866158 |
| 44 | 1  | 0 | 1.366199  | -1.380149 | -1.134520 |
| 45 | 1  | 0 | 2.739171  | -2.846419 | -2.617147 |
| 46 | 1  | 0 | 5.203062  | -2.423883 | -2.846383 |
| 47 | 6  | 0 | -3.746249 | 0.348756  | 1.412874  |
| 48 | 26 | 0 | -5.049637 | 1.125380  | 2.727362  |
| 49 | 6  | 0 | -4.357004 | -0.717661 | 2.210334  |
| 50 | 6  | 0 | -4.820693 | 1.010034  | 0.687831  |
| 51 | 6  | 0 | -6.042006 | 0.368905  | 1.044041  |
| 52 | 6  | 0 | -5.753044 | -0.702981 | 1.966221  |
| 53 | 6  | 0 | -5.125108 | 1.747330  | 4.669693  |

|    |   |   |           |           |           |
|----|---|---|-----------|-----------|-----------|
| 54 | 6 | 0 | -4.630599 | 2.807395  | 3.816418  |
| 55 | 6 | 0 | -5.644035 | 3.110800  | 2.857936  |
| 56 | 6 | 0 | -6.756101 | 2.222911  | 3.094903  |
| 57 | 6 | 0 | -6.445174 | 1.408620  | 4.239086  |
| 58 | 1 | 0 | -3.808506 | -1.510410 | 2.710365  |
| 59 | 1 | 0 | -4.691228 | 1.751283  | -0.092019 |
| 60 | 1 | 0 | -7.009394 | 0.547958  | 0.585707  |
| 61 | 1 | 0 | -6.472301 | -1.438175 | 2.316912  |
| 62 | 1 | 0 | -4.669348 | 1.442699  | 5.608428  |
| 63 | 1 | 0 | -3.750378 | 3.408719  | 4.023805  |
| 64 | 1 | 0 | -5.643531 | 3.950588  | 2.172602  |
| 65 | 1 | 0 | -7.735422 | 2.311796  | 2.637378  |
| 66 | 1 | 0 | -7.136328 | 0.752914  | 4.759656  |

---



**Table S6.** The DFT coordinates used for energy optimization of complex **5**.

| Centre No. | Atomic No. | Atomic Type | Coordinates (Angstroms) |           |           |
|------------|------------|-------------|-------------------------|-----------|-----------|
|            |            |             | X                       | Y         | Z         |
| 1          | 6          | 0           | -0.040703               | -4.616052 | -1.039533 |
| 2          | 6          | 0           | -0.990556               | -3.636479 | -0.688806 |
| 3          | 6          | 0           | -0.611988               | -2.296649 | -0.722578 |
| 4          | 7          | 0           | 0.675420                | -1.900220 | -1.080124 |
| 5          | 6          | 0           | 1.571658                | -2.855871 | -1.422968 |
| 6          | 6          | 0           | 1.240823                | -4.228735 | -1.412984 |
| 7          | 6          | 0           | -3.564087               | 0.049568  | 0.113284  |
| 8          | 6          | 0           | -2.851831               | 1.271802  | -0.047850 |
| 9          | 6          | 0           | -1.499907               | 1.235864  | -0.374388 |
| 10         | 7          | 0           | -0.847242               | 0.039902  | -0.536233 |
| 11         | 6          | 0           | -1.519455               | -1.151363 | -0.419181 |
| 12         | 6          | 0           | -2.871269               | -1.177642 | -0.094202 |
| 13         | 6          | 0           | -0.932749               | 3.720651  | -0.560580 |
| 14         | 6          | 0           | 0.032526                | 4.696605  | -0.877880 |
| 15         | 6          | 0           | 1.308313                | 4.302266  | -1.263319 |
| 16         | 6          | 0           | 1.617769                | 2.925511  | -1.319471 |
| 17         | 7          | 0           | 0.706499                | 1.973007  | -1.009102 |
| 18         | 6          | 0           | -0.574863               | 2.377015  | -0.638541 |
| 19         | 6          | 0           | 5.050023                | 0.010766  | -1.163565 |
| 20         | 6          | 0           | 3.700307                | 0.010565  | -0.795070 |
| 21         | 6          | 0           | 3.379044                | -0.018218 | 0.629960  |
| 22         | 6          | 0           | 4.411316                | -0.046276 | 1.605870  |
| 23         | 6          | 0           | 5.758246                | -0.044763 | 1.149526  |
| 24         | 6          | 0           | 6.071986                | -0.016863 | -0.200527 |
| 25         | 7          | 0           | 2.025209                | -0.016102 | 0.949811  |

|    |    |   |           |           |           |
|----|----|---|-----------|-----------|-----------|
| 26 | 6  | 0 | 1.698102  | -0.042604 | 2.247748  |
| 27 | 6  | 0 | 2.672766  | -0.072207 | 3.295121  |
| 28 | 6  | 0 | 4.010721  | -0.073993 | 2.980935  |
| 29 | 8  | 0 | 2.728773  | 0.034928  | -1.655602 |
| 30 | 29 | 0 | 0.990008  | 0.032321  | -0.951755 |
| 31 | 1  | 0 | -0.319685 | -5.674484 | -1.018957 |
| 32 | 1  | 0 | -2.000908 | -3.930791 | -0.399693 |
| 33 | 1  | 0 | 2.580997  | -2.507610 | -1.721130 |
| 34 | 1  | 0 | 1.994504  | -4.968480 | -1.698669 |
| 35 | 1  | 0 | -3.366831 | 2.224065  | 0.080731  |
| 36 | 1  | 0 | -3.398855 | -2.127069 | 0.011895  |
| 37 | 1  | 0 | -1.938877 | 4.020815  | -0.263832 |
| 38 | 1  | 0 | -0.230124 | 5.757931  | -0.822421 |
| 39 | 1  | 0 | 2.073684  | 5.039378  | -1.523690 |
| 40 | 1  | 0 | 2.621739  | 2.571580  | -1.629428 |
| 41 | 1  | 0 | 7.121544  | -0.016311 | -0.520111 |
| 42 | 1  | 0 | 0.632204  | -0.041269 | 2.501464  |
| 43 | 1  | 0 | 2.335349  | -0.093054 | 4.331604  |
| 44 | 1  | 0 | 4.775110  | -0.096287 | 3.763516  |
| 45 | 53 | 0 | 5.542690  | 0.053565  | -3.193809 |
| 46 | 17 | 0 | 7.027590  | -0.078310 | 2.303493  |
| 47 | 6  | 0 | -4.963382 | 0.053071  | 0.442362  |
| 48 | 26 | 0 | -5.838254 | -0.230245 | 2.226548  |
| 49 | 6  | 0 | -5.859898 | -1.104946 | 0.388725  |
| 50 | 6  | 0 | -5.782251 | 1.212903  | 0.765701  |
| 51 | 6  | 0 | -7.127168 | 0.766742  | 0.909183  |
| 52 | 6  | 0 | -7.175367 | -0.654495 | 0.661011  |
| 53 | 6  | 0 | -5.585570 | -1.311924 | 3.938896  |

|    |   |   |           |           |           |
|----|---|---|-----------|-----------|-----------|
| 54 | 6 | 0 | -4.807159 | -0.092072 | 3.989796  |
| 55 | 6 | 0 | -5.708189 | 1.010478  | 3.886665  |
| 56 | 6 | 0 | -7.041611 | 0.479031  | 3.743651  |
| 57 | 6 | 0 | -6.963851 | -0.955527 | 3.814537  |
| 58 | 1 | 0 | -5.592924 | -2.078560 | -0.011954 |
| 59 | 1 | 0 | -5.449177 | 2.244042  | 0.744750  |
| 60 | 1 | 0 | -7.997537 | 1.404156  | 1.029489  |
| 61 | 1 | 0 | -8.083768 | -1.246262 | 0.584620  |
| 62 | 1 | 0 | -5.209465 | -2.299731 | 4.193234  |
| 63 | 1 | 0 | -3.764866 | -0.035893 | 4.287569  |
| 64 | 1 | 0 | -5.459394 | 2.054699  | 4.037263  |
| 65 | 1 | 0 | -7.955795 | 1.059931  | 3.802390  |
| 66 | 1 | 0 | -7.807071 | -1.635160 | 3.892758  |

---

**Table S7.** The DFT coordinates used for energy optimization of complex **6**.

| Centre No. | Atomic No. | Atomic Type | Coordinates (Angstroms) |           |           |
|------------|------------|-------------|-------------------------|-----------|-----------|
|            |            |             | X                       | Y         | Z         |
| 1          | 6          | 0           | -0.952236               | -4.509950 | -1.393445 |
| 2          | 6          | 0           | -1.957739               | -3.569043 | -1.097834 |
| 3          | 6          | 0           | -1.591262               | -2.241328 | -0.890485 |
| 4          | 7          | 0           | -0.265127               | -1.818579 | -0.959633 |
| 5          | 6          | 0           | 0.686109                | -2.737960 | -1.252011 |
| 6          | 6          | 0           | 0.372287                | -4.096106 | -1.475599 |
| 7          | 6          | 0           | -4.667982               | 0.004694  | -0.252900 |
| 8          | 6          | 0           | -3.949214               | 1.227417  | -0.110872 |
| 9          | 6          | 0           | -2.563544               | 1.221642  | -0.215912 |
| 10         | 7          | 0           | -1.878035               | 0.051970  | -0.437054 |
| 11         | 6          | 0           | -2.548521               | -1.135015 | -0.598278 |
| 12         | 6          | 0           | -3.934623               | -1.190650 | -0.503777 |
| 13         | 6          | 0           | -2.004825               | 3.696968  | 0.069687  |
| 14         | 6          | 0           | -1.011973               | 4.695799  | 0.085242  |
| 15         | 6          | 0           | 0.317759                | 4.344979  | -0.117727 |
| 16         | 6          | 0           | 0.649447                | 2.989042  | -0.328438 |
| 17         | 7          | 0           | -0.289452               | 2.012312  | -0.340284 |
| 18         | 6          | 0           | -1.620798               | 2.375515  | -0.145853 |
| 19         | 6          | 0           | 4.065755                | 0.040028  | -0.123082 |
| 20         | 6          | 0           | 2.669165                | 0.004488  | 0.038906  |
| 21         | 6          | 0           | 2.129485                | -0.218278 | 1.382326  |
| 22         | 6          | 0           | 2.990510                | -0.394169 | 2.495328  |
| 23         | 6          | 0           | 4.398776                | -0.348124 | 2.268442  |
| 24         | 6          | 0           | 4.902060                | -0.133191 | 0.971798  |
| 25         | 7          | 0           | 0.740160                | -0.240836 | 1.465085  |

|    |    |   |           |           |           |
|----|----|---|-----------|-----------|-----------|
| 26 | 6  | 0 | 0.195326  | -0.440321 | 2.667263  |
| 27 | 6  | 0 | 0.983535  | -0.627751 | 3.848903  |
| 28 | 6  | 0 | 2.350502  | -0.605274 | 3.765206  |
| 29 | 8  | 0 | 1.846825  | 0.158985  | -0.941014 |
| 30 | 29 | 0 | -0.002406 | 0.079080  | -0.526214 |
| 31 | 1  | 0 | -1.220384 | -5.558899 | -1.558164 |
| 32 | 1  | 0 | -3.001258 | -3.882981 | -1.035274 |
| 33 | 1  | 0 | 1.729001  | -2.373630 | -1.313545 |
| 34 | 1  | 0 | 1.172248  | -4.805417 | -1.709031 |
| 35 | 1  | 0 | -4.490143 | 2.160695  | 0.057161  |
| 36 | 1  | 0 | -4.462212 | -2.136970 | -0.627646 |
| 37 | 1  | 0 | -3.052729 | 3.962613  | 0.222347  |
| 38 | 1  | 0 | -1.294046 | 5.740370  | 0.254651  |
| 39 | 1  | 0 | 1.108164  | 5.101793  | -0.115754 |
| 40 | 1  | 0 | 1.696835  | 2.675490  | -0.498052 |
| 41 | 1  | 0 | 5.994798  | -0.102888 | 0.829859  |
| 42 | 1  | 0 | -0.897622 | -0.458974 | 2.738206  |
| 43 | 1  | 0 | 0.478351  | -0.786494 | 4.803282  |
| 44 | 1  | 0 | 2.978137  | -0.747204 | 4.661158  |
| 45 | 7  | 0 | 5.374374  | -0.517327 | 3.343064  |
| 46 | 8  | 0 | 4.975868  | -0.706565 | 4.484658  |
| 47 | 8  | 0 | 6.556724  | -0.459829 | 3.038608  |
| 48 | 1  | 0 | 4.476574  | 0.205232  | -1.118570 |
| 49 | 6  | 0 | -6.097142 | -0.022956 | -0.123635 |
| 50 | 26 | 0 | -7.474895 | 0.447891  | -1.503011 |
| 51 | 6  | 0 | -6.937750 | 1.078736  | 0.355706  |
| 52 | 6  | 0 | -6.973868 | -1.167058 | -0.337895 |
| 53 | 6  | 0 | -8.298171 | -0.765407 | -0.003947 |

|    |   |   |           |           |           |
|----|---|---|-----------|-----------|-----------|
| 54 | 6 | 0 | -8.271525 | 0.609233  | 0.436889  |
| 55 | 6 | 0 | -7.753516 | 1.746456  | -3.051934 |
| 56 | 6 | 0 | -7.028886 | 0.574502  | -3.497407 |
| 57 | 6 | 0 | -7.856814 | -0.566575 | -3.274339 |
| 58 | 6 | 0 | -9.083084 | -0.110555 | -2.665674 |
| 59 | 6 | 0 | -9.029331 | 1.323311  | -2.566340 |
| 60 | 1 | 0 | -6.563378 | 2.003684  | 0.784667  |
| 61 | 1 | 0 | -6.647603 | -2.176891 | -0.558049 |
| 62 | 1 | 0 | -9.162762 | -1.419010 | 0.059596  |
| 63 | 1 | 0 | -9.115022 | 1.145746  | 0.863911  |
| 64 | 1 | 0 | -7.472399 | 2.772506  | -3.276835 |
| 65 | 1 | 0 | -6.126663 | 0.598079  | -4.101565 |
| 66 | 1 | 0 | -7.667791 | -1.572452 | -3.631712 |
| 67 | 1 | 0 | -9.972845 | -0.714871 | -2.523903 |
| 68 | 1 | 0 | -9.856155 | 1.973817  | -2.296935 |

---

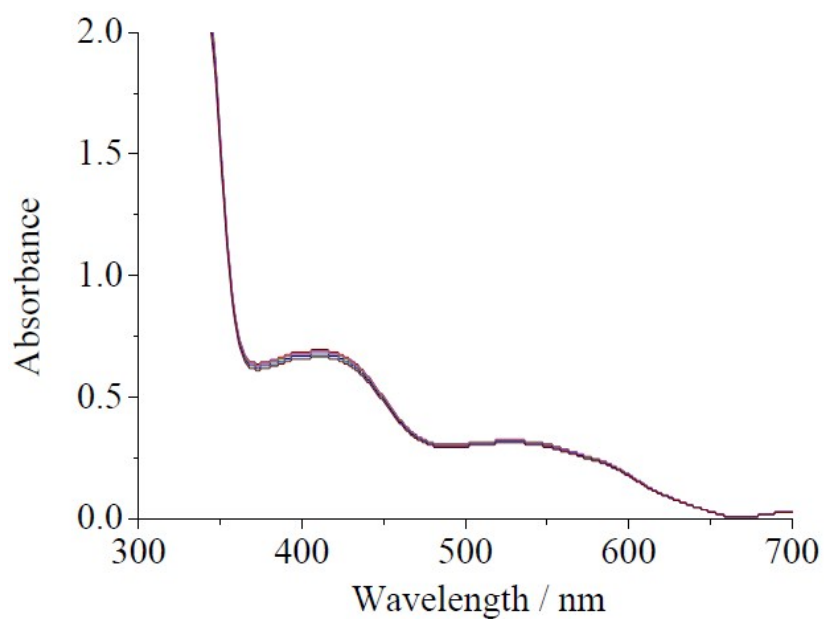

**Fig. S19.** Absorption spectral plots of complex **5** in DMSO–10% DMEM medium (1:99 v/v, pH = 7.4, 37 °C). The spectra were recorded after keeping the solution at 37 °C and recorded at different time intervals. The spectral data indicate the stability of the complex in the cellular medium up to 48 hours.

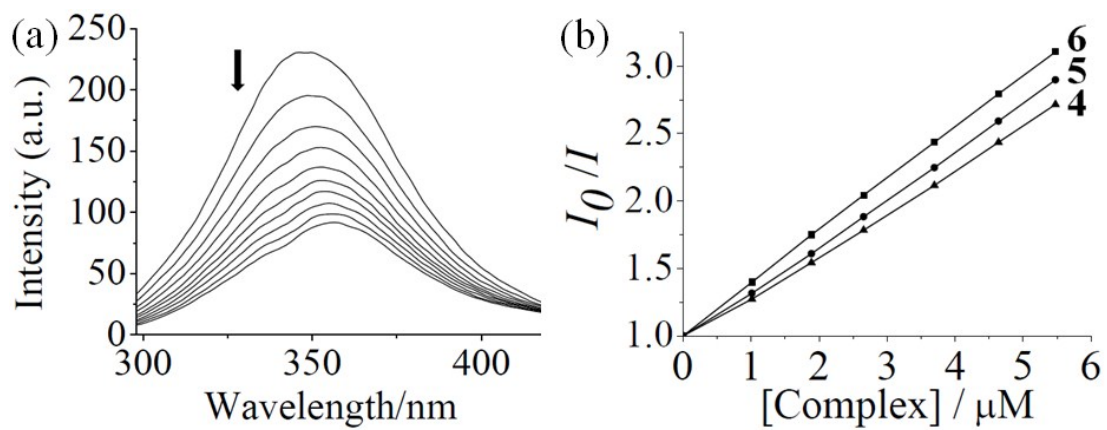

**Fig. S20.** Emission spectral traces of human serum albumin (2  $\mu\text{M}$ ) in the presence of complex 5. The inset shows the plots of ( $I_0/I$ ) vs [complex] for 4 (▲), 5 (●) and 6 (■).



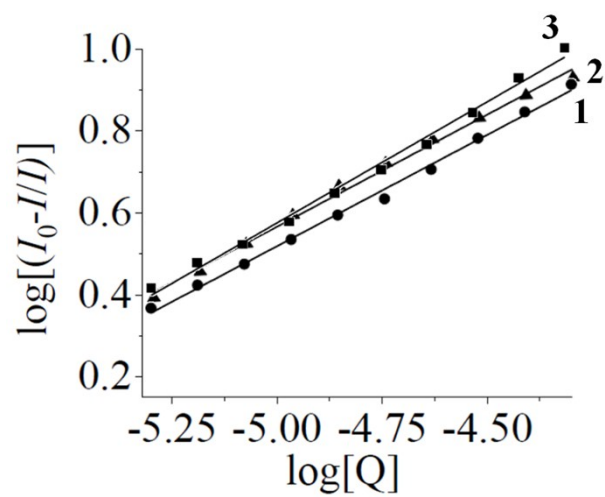

**Fig. S21:** Scatchard plots of  $\log[(I_0 - I)/I]$  against  $\log[Q]$  for **1** (●), **2** (▲) and **3** (■) to determine the binding constant ( $K_{\text{HSA}}$ ) for HSA–complex interaction.

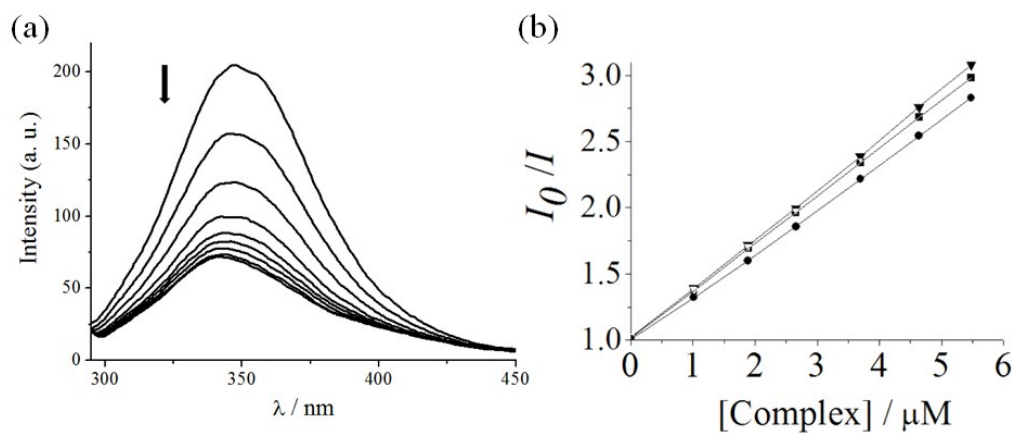

**Fig. S22.** Emission spectral traces of human serum albumin (2  $\mu$ M) in the presence of complex **3**. The inset shows the plots of ( $I_0/I$ ) vs [complex] for **1** (●), **2** (■) and **3** (▼).
